# Supplementary material for: Mitophagy and Mitochondria Biogenesis Are Differentially Induced in Rat Skeletal Muscles during Immobilization and/or Remobilization
Source: MDPI journal article supplement (doi:10.3390/ijms21103691), 2020-05-23
Supplement: s1 [file s1]

**Table S1.** Primer design for the PCR assays.

| Gene           | Accession Number | Sequence 5' to 3'                                                          |
|----------------|------------------|----------------------------------------------------------------------------|
| <i>BAG3</i>    | NM_0010111936    | <i>F:</i> ACCGGTTCACCTGCCCATC<br><i>R:</i> GTTTTCGGGTGTTGGGTGACAG          |
| <i>BNIP3</i>   | NM_053420        | <i>F:</i> GGACGAAGCAGCTCCAAGAG<br><i>R:</i> CACCAAAGCTGTGGGTGTCT           |
| <i>BNIP3L</i>  | NM_080888        | <i>F:</i> CAGCATGAGTCGGGACAGAG<br><i>R:</i> CCTGCTGGTGTGCATCTCA            |
| <i>DYNC1H1</i> | NM_019226        | <i>F:</i> TCAGCAAATTTGGGCAGATG<br><i>R:</i> GTGTCAACGGAGTGCTGCTC           |
| <i>FUNDC1</i>  | NM_001025027     | <i>F:</i> GGCTGGTGTGCAGGATTTTT<br><i>R:</i> CCACTGTGACTGGCAACCTG           |
| <i>DYSF</i>    | NM_001107869     | <i>F:</i> ACCAGACTCGGCTACCTGGA<br><i>R:</i> CGGGCATTCAATATCGTCCT           |
| <i>HSPB8</i>   | NM_053612        | <i>F:</i> CAGCTTCCTGCAGAAGTGGA<br><i>R:</i> GGGTGAGTAAGGAGGGACCTG          |
| <i>KIF5B</i>   | NM_057202        | <i>F:</i> CCACCAGAAGAAACGAGCAG<br><i>R:</i> CCCTCCGGTTGCTTTACATC           |
| <i>LAMP2</i>   | NM_017068        | <i>F:</i> GCCTTTATGCAGAATGGGAGA<br><i>R:</i> TGTACCTTGTGAGGCACTGT          |
| <i>MIRO1</i>   | NM_001107026     | <i>F:</i> ACAAATGAAAGCGGCTGGAT<br><i>R:</i> GCCCAGATACTCCAGACAACG          |
| <i>NRF1</i>    | NM_001100708     | <i>F:</i> GGGGCAACAGTAGCCACATT<br><i>R:</i> CACCTCTCCATCAGCCACAG           |
| <i>TFAM</i>    | NM_031326        | <i>F:</i> AATGTGGGGCGTGCTAAGAA<br><i>R:</i> GCTGACAGGCGAGGGTATG            |
| <i>TRAK1</i>   | NM_001134565     | <i>F:</i> AACCTGCGGAACAAGACGAT<br><i>R:</i> CGCATGGTTCCCTCAATTTC           |
| <i>YAP1</i>    | NM_001034002     | <i>F:</i> CATGCTCTCCCAACTGAACG<br><i>R:</i> TCCCATCCATCAGGAAGAGG           |
| <i>18S</i>     | NM_003278        | <i>F:</i> AATCAGTTATGGTTCCTTTGTCTG<br><i>R:</i> GGTCTAGAATTACCACAGTTATCCAA |

*F* forward, *R* reverse; BAG3, Bcl2-associated athanogene 3; BNIP3, BCL2-interacting protein 3; BNIP3L, BCL2-interacting protein 3-like; DYSF, DYNC1H1, Cytoplasmic dynein 1 heavy chain 1; Dysferlin; FUNDC1, FUN14 domain-containing protein 1; HSPB8, heat shock protein family B (small) member 8; KIF5B, Kinesin-1 heavy chain; LAMP2, lysosomal-associated membrane protein 2; MIRO1, Mitochondrial Rho GTPase 1; NRF1, Nuclear respiratory factor 1; TFAM, Mitochondrial transcription factor A; TRAK1, Trafficking kinesin-binding protein 1; YAP1, yes-associated protein 1.

**Table S2.** Primary antibodies used for Western blots.

| Antibody           | Dilutions | Source                     |
|--------------------|-----------|----------------------------|
| Goat anti-PGC1A    | 1:500     | Abnova, #PAB7302           |
| Rabbit anti-MFN2   | 1:2000    | Abcam, #Ab124773           |
| Mouse anti-OPA1    | 1:1000    | BD Biosciences, #612606    |
| Rabbit anti-FIS1   | 1:1000    | Abcam, #Ab71498            |
| Mouse anti-PARKIN  | 1:10000   | Sigma-Aldrich, #P6248      |
| Anti-SQSTM1        | 1:5000    | Interchim, #8878-M01       |
| Rabbit anti-LC3    | 1:1000    | Sigma-Aldrich, #L7543      |
| Rabbit Anti-UBE2L3 | 1:1000    | Sigma-Aldrich, #SAB2501081 |

PGC1A, Peroxisome proliferator-activated receptor gamma coactivator 1-alpha; MFN2, mitofusin 2; OPA1, mitochondrial Dynamin Like GTPase; FIS1, mitochondrial fission 1 protein; PARKIN, E3

ubiquitin-protein ligase; SQSTM1, ubiquitin-binding protein p62; LC3, Microtubule-associated proteins 1A/1B light chain 3B; UBE2L3, ubiquitin-conjugating enzyme E3 L3.
